# Supplementary material for: Codon-Driven Translational Efficiency Is Stable across Diverse Mammalian Cell States
Source: PLoS Genet. 2016 May 11;12(5):e1006024. doi: 10.1371/journal.pgen.1006024 (PMC4864286; doi:10.1371/journal.pgen.1006024)
Supplement: S8 Table — (XLSX) [file pgen.1006024.s020.xlsx]

## Sheet: liver-adult-vs-Huh7
gene ID	baseMean	log2FoldChange	lfcSE	stat	pvalue	padj
1.trna66	797.943	-2.55315	0.311768	-8.18928	2.62804e-16	4.87502e-14
2.trna2	1024.9	-2.40531	0.291034	-8.2647	1.40051e-16	4.87502e-14
1.trna82	725.224	-2.46539	0.313124	-7.87353	3.4477e-15	3.19774e-13
8.trna10	1142.44	-2.42024	0.306651	-7.8925	2.96189e-15	3.19774e-13
16.trna16	1122.35	-2.19276	0.279658	-7.84086	4.47474e-15	3.32025e-13
19.trna2	1231.7	-2.33367	0.302135	-7.72394	1.1279e-14	6.9742e-13
6.trna8	583.435	-2.80442	0.367142	-7.63851	2.19741e-14	1.16463e-12
6.trna159	115.088	6.34536	0.852541	7.44288	9.85151e-14	4.56864e-12
1.trna97	126.499	4.81041	0.648557	7.4171	1.19713e-13	4.93485e-12
2.trna3	711.16	-2.32063	0.316498	-7.33219	2.26416e-13	7.831e-12
6.trna7	793.909	-2.28341	0.311566	-7.32882	2.32186e-13	7.831e-12
14.trna7	932.882	-2.17285	0.298851	-7.27066	3.57735e-13	1.106e-11
1.trna85	214.11	3.57377	0.495315	7.21516	5.38721e-13	1.53743e-11
6.trna2	671.132	-2.27186	0.315405	-7.20298	5.89122e-13	1.56117e-11
6.trna25	119.309	4.57537	0.639059	7.15954	8.09482e-13	2.00212e-11
16.trna20	139.587	4.09119	0.575827	7.1049	1.20407e-12	2.79193e-11
12.trna12	716.09	-2.27278	0.32031	-7.09557	1.28819e-12	2.81128e-11
1.trna88	189.845	3.85703	0.546569	7.0568	1.70379e-12	3.46686e-11
6.trna144	107.877	5.6417	0.80012	7.05107	1.77548e-12	3.46686e-11
6.trna147	96.1776	6.53519	0.931857	7.01309	2.33115e-12	4.32428e-11
6.trna106	604.624	-2.3766	0.342793	-6.93306	4.11825e-12	7.27558e-11
1.trna91	212.323	3.6432	0.528044	6.89943	5.22102e-12	8.80454e-11
6.trna44	502.743	-2.33065	0.338509	-6.88505	5.77676e-12	9.31816e-11
11.trna8	799.87	-2.15426	0.315693	-6.82392	8.85918e-12	1.36948e-10
1.trna94	192.809	3.56326	0.526784	6.76418	1.34067e-11	1.98956e-10
6.trna132	722.386	-2.09524	0.311743	-6.72106	1.80413e-11	2.57435e-10
1.trna115	84.7422	6.90727	1.02878	6.71407	1.89267e-11	2.60067e-10
16.trna3	426.479	-2.84227	0.431571	-6.58586	4.52248e-11	5.99229e-10
6.trna67	76.7737	6.21086	0.951311	6.52874	6.63259e-11	8.48514e-10
6.trna6	94.7651	4.61609	0.709146	6.50936	7.54731e-11	9.33351e-10
1.trna129	82.5073	-5.28514	0.816503	-6.4729	9.61376e-11	1.15055e-09
6.trna26	75.5079	6.73444	1.04326	6.45521	1.08071e-10	1.25294e-09
16.trna11	85.0532	4.84851	0.757211	6.40312	1.52237e-10	1.71152e-09
16.trna9	69.8304	6.54863	1.04527	6.26505	3.72717e-10	4.06699e-09
1.trna9	758.373	-2.41944	0.387603	-6.24206	4.31835e-10	4.56405e-09
15.trna9	794.612	-1.88994	0.302966	-6.23812	4.42873e-10	4.56405e-09
16.trna1	741.805	-1.99092	0.322346	-6.17634	6.56048e-10	6.57821e-09
16.trna34	645.091	-2.00807	0.329883	-6.08724	1.14875e-09	1.12154e-08
6.trna51	81.0275	4.59822	0.759782	6.05202	1.43039e-09	1.36071e-08
14.trna6	611.008	-1.93938	0.321729	-6.02799	1.66016e-09	1.53979e-08
6.trna42	91.3732	4.30731	0.718257	5.99689	2.01131e-09	1.81999e-08
11.trna14	282.502	2.66811	0.446373	5.97732	2.26837e-09	2.00373e-08
6.trna141	59.2848	6.28959	1.06811	5.88852	3.89658e-09	3.36194e-08
6.trna181	391.49	-2.81207	0.48104	-5.8458	5.04131e-09	4.25074e-08
16.trna10	57.6341	7.09592	1.22072	5.81291	6.13951e-09	5.06169e-08
6.trna43	67.5398	5.46907	0.943502	5.79656	6.76897e-09	5.39729e-08
6.trna179	462.415	-2.00219	0.345511	-5.79487	6.83754e-09	5.39729e-08
12.trna8	551.124	-1.97967	0.34501	-5.738	9.58032e-09	7.40479e-08
6.trna9	421.662	-2.17502	0.379831	-5.72628	1.02657e-08	7.77257e-08
6.trna153	54.4595	7.01386	1.22685	5.71696	1.08444e-08	8.04657e-08
1.trna79	593.324	-1.89816	0.333494	-5.69172	1.25766e-08	9.14885e-08
6.trna14	344.626	-2.16996	0.383003	-5.66565	1.46466e-08	1.04498e-07
14.trna1	651.877	-1.78198	0.316571	-5.62899	1.81265e-08	1.26886e-07
15.trna11	682.201	-1.95993	0.349002	-5.6158	1.9565e-08	1.34419e-07
6.trna139	88.2979	4.08534	0.728042	5.61141	2.00684e-08	1.35371e-07
1.trna5	114.264	3.37616	0.603734	5.59213	2.24295e-08	1.45989e-07
5.trna8	732.994	-1.72723	0.308848	-5.5925	2.23821e-08	1.45989e-07
6.trna105	619.585	-2.4212	0.434397	-5.57372	2.49359e-08	1.59504e-07
1.trna119	51.4835	6.06296	1.08921	5.56638	2.60085e-08	1.60819e-07
16.trna26	972.572	-1.85639	0.333439	-5.56741	2.58547e-08	1.60819e-07
17.trna38	712.622	-1.72353	0.310398	-5.55265	2.8137e-08	1.71128e-07
17.trna26	770.85	-1.77999	0.32166	-5.53374	3.13468e-08	1.87575e-07
6.trna154	86.2359	3.90277	0.713223	5.47202	4.44947e-08	2.62024e-07
1.trna96	136.005	4.36285	0.803385	5.43058	5.61721e-08	3.25623e-07
6.trna143	124.979	3.27385	0.608145	5.38334	7.3118e-08	4.17335e-07
6.trna57	73.9751	4.04955	0.760034	5.32811	9.92385e-08	5.57841e-07
16.trna29	64.71	4.34436	0.818537	5.30747	1.11156e-07	6.15506e-07
6.trna61	60.227	4.59188	0.868781	5.28542	1.25414e-07	6.84242e-07
1.trna148	184.329	2.91076	0.551808	5.27495	1.32789e-07	7.13982e-07
16.trna7	79.473	4.09667	0.777621	5.2682	1.37765e-07	7.30155e-07
6.trna80	55.8147	5.14341	0.983695	5.22866	1.7074e-07	8.92175e-07
15.trna10	717.957	-1.59453	0.305655	-5.21676	1.8208e-07	9.38218e-07
1.trna2	166.925	2.62046	0.504255	5.1967	2.02857e-07	1.01861e-06
14.trna19	55.1338	4.52327	0.870461	5.19641	2.03173e-07	1.01861e-06
6.trna112	102.421	3.18667	0.617271	5.16251	2.4366e-07	1.2053e-06
2.trna5	558.141	-2.3582	0.457269	-5.15713	2.50762e-07	1.22411e-06
6.trna142	49.443	4.82376	0.936558	5.15052	2.59761e-07	1.25158e-06
1.trna104	128.244	3.11855	0.613752	5.08113	3.75196e-07	1.762e-06
1.trna150	165.221	3.3363	0.656377	5.08289	3.71726e-07	1.762e-06
6.trna108	96.8232	4.05208	0.806736	5.02281	5.09211e-07	2.36147e-06
6.trna77	695.015	-1.58901	0.31826	-4.99281	5.95082e-07	2.72562e-06
6.trna149	45.9028	5.074	1.01968	4.97605	6.48937e-07	2.93604e-06
6.trna118	39.6548	5.63192	1.13331	4.96943	6.7151e-07	3.00157e-06
6.trna136	664.466	-2.14485	0.433277	-4.95031	7.40954e-07	3.27254e-06
1.trna7	149.498	2.53878	0.514672	4.9328	8.10586e-07	3.53797e-06
17.trna10	693.011	-1.71872	0.3531	-4.86752	1.13005e-06	4.87498e-06
17.trna12	788.073	-1.51363	0.31376	-4.82416	1.40595e-06	5.99548e-06
6.trna11	486.668	-1.63765	0.341454	-4.79609	1.61793e-06	6.82106e-06
10.trna2	632.328	-1.59489	0.333257	-4.78578	1.70324e-06	7.10001e-06
16.trna27	830.846	-1.98583	0.417025	-4.76189	1.91788e-06	7.90593e-06
11.trna4	354.482	1.76213	0.372104	4.73557	2.18436e-06	8.90548e-06
6.trna111	53.037	3.96789	0.839995	4.72371	2.31583e-06	9.33885e-06
6.trna10	505.016	-2.06018	0.439088	-4.69195	2.70619e-06	1.06808e-05
6.trna160	34.9537	5.4222	1.15511	4.6941	2.67778e-06	1.06808e-05
6.trna129	71.7264	3.33445	0.717234	4.64904	3.33486e-06	1.30235e-05
17.trna5	510.986	-1.53246	0.334242	-4.58489	4.54215e-06	1.75535e-05
1.trna99	501.508	-1.50758	0.332767	-4.53044	5.88599e-06	2.25124e-05
1.trna46	971.09	-1.32082	0.291991	-4.52349	6.08278e-06	2.30277e-05
1.trna81	401.115	-1.63657	0.36487	-4.48534	7.27975e-06	2.72807e-05
6.trna131	106.143	3.40008	0.759521	4.47661	7.58365e-06	2.81353e-05
6.trna103	443.684	-1.80782	0.404905	-4.46479	8.01467e-06	2.944e-05
11.trna11	626.136	-1.72584	0.389243	-4.43383	9.25719e-06	3.36708e-05
1.trna27	299.623	-1.77108	0.400766	-4.41922	9.90558e-06	3.56793e-05
19.trna4	1021.61	-1.26486	0.289861	-4.36367	1.27897e-05	4.56247e-05
6.trna162	291.217	-1.74661	0.404986	-4.31275	1.61234e-05	5.69692e-05
1.trna98	113.554	2.55637	0.595931	4.2897	1.78915e-05	6.20351e-05
6.trna36	40.02	4.0601	0.946034	4.2917	1.77307e-05	6.20351e-05
6.trna175	574.922	-1.37404	0.32114	-4.27864	1.88039e-05	6.45949e-05
6.trna64	106.998	2.64857	0.620228	4.27031	1.95199e-05	6.58354e-05
6.trna66	81.7932	3.199	0.74888	4.27171	1.93979e-05	6.58354e-05
12.trna4	760.197	-1.39038	0.328296	-4.23514	2.28413e-05	7.63436e-05
14.trna13	502.363	-1.59243	0.378387	-4.20846	2.57118e-05	8.51703e-05
1.trna23	113.963	2.39606	0.569701	4.20582	2.60143e-05	8.54097e-05
1.trna51	59.4726	3.54918	0.847866	4.18601	2.83897e-05	9.2391e-05
13.trna1	357.84	-1.62047	0.390089	-4.15411	3.26553e-05	0.000105349
6.trna174	357.751	-1.59663	0.387234	-4.12315	3.73719e-05	0.000119526
6.trna71	52.8724	3.44935	0.837514	4.11856	3.81245e-05	0.000120891
12.trna13	404.256	-1.66186	0.408044	-4.07275	4.64621e-05	0.00014608
6.trna33	126.234	-2.29453	0.563897	-4.06906	4.72031e-05	0.000147163
17.trna27	497.815	-1.34662	0.333155	-4.04201	5.29947e-05	0.000163842
6.trna74	411.915	-1.4577	0.36238	-4.02258	5.75636e-05	0.000176497
17.trna2	603.114	-1.35283	0.337129	-4.01281	6.00013e-05	0.000182463
12.trna11	461.148	-1.38904	0.346736	-4.00603	6.17468e-05	0.000186244
12.trna6	420.419	-1.45566	0.363794	-4.00132	6.29898e-05	0.000188461
13.trna3	771.185	-1.49435	0.374162	-3.99387	6.50048e-05	0.000192934
12.trna10	639.258	-1.78183	0.447024	-3.98599	6.72002e-05	0.000197867
14.trna2	178.484	1.87888	0.475165	3.95417	7.68022e-05	0.000224359
1.trna68	555.587	-1.42538	0.361066	-3.9477	7.89055e-05	0.000228703
14.trna21	473.205	-1.46367	0.371269	-3.94236	8.06854e-05	0.000232049
6.trna127	84.0884	2.86265	0.731776	3.91192	9.15645e-05	0.000261311
1.trna22	131.319	2.20459	0.565178	3.90069	9.59176e-05	0.000271644
1.trna73	330.103	1.59978	0.410592	3.89627	9.76845e-05	0.000274426
5.trna5	90.866	2.45902	0.6314	3.89456	9.83792e-05	0.000274426
5.trna15	485.346	-1.44075	0.371665	-3.87648	0.000105979	0.00029168
6.trna5	110.503	2.24951	0.580351	3.87612	0.000106137	0.00029168
14.trna3	185.774	1.80201	0.465136	3.87415	0.000106998	0.000291883
1.trna26	762.845	-1.16964	0.302555	-3.86588	0.000110691	0.000299755
7.trna3	668.312	-1.69704	0.440056	-3.85642	0.000115062	0.000309332
11.trna3	274.539	1.75676	0.46015	3.81779	0.000134654	0.0003594
6.trna104	516.592	-1.62296	0.426965	-3.80115	0.000144025	0.00037896
6.trna123	137.862	2.40732	0.633309	3.80117	0.000144015	0.00037896
6.trna119	31.8242	3.99837	1.05538	3.78858	0.000151513	0.000395855
1.trna84	29.9078	4.32015	1.15125	3.75258	0.000175022	0.000454077
6.trna176	51.9953	3.42769	0.918647	3.73124	0.00019054	0.000490905
1.trna110	102.32	2.71979	0.7322	3.71455	0.000203566	0.000520849
7.trna15	32.9467	3.68302	0.997207	3.69333	0.000221336	0.000562436
17.trna20	540.346	-1.18932	0.3266	-3.64151	0.000271043	0.000684061
6.trna69	25.9744	4.27301	1.18003	3.62112	0.000293333	0.000735314
11.trna12	521.156	1.20414	0.334233	3.60269	0.000314936	0.000784169
1.trna54	41.1728	3.49397	0.972967	3.59105	0.000329347	0.000814586
3.trna2	433.318	-1.50247	0.418966	-3.58614	0.000335605	0.000824565
1.trna93	30.3801	4.05691	1.13236	3.58269	0.000340076	0.000824629
17.trna9	607.897	-1.35963	0.379444	-3.5832	0.000339409	0.000824629
1.trna76	471.557	-1.27384	0.358804	-3.55025	0.000384866	0.000927177

## Sheet: liver-adult-vs-HepG2
Gene ID	baseMean	log2FoldChange	lfcSE	stat	pvalue	padj
16.trna20	187.177	5.1021	0.561572	9.0854	1.03321e-19	3.83322e-17
1.trna85	184.377	3.9308	0.512199	7.67435	1.66257e-14	3.08407e-12
6.trna6	99.1213	5.28639	0.701429	7.5366	4.82398e-14	5.96566e-12
1.trna88	162.245	4.20113	0.562446	7.46938	8.05728e-14	7.47313e-12
1.trna150	209.974	4.33953	0.592218	7.32759	2.34322e-13	1.73867e-11
1.trna91	177.56	3.95447	0.544747	7.25927	3.89172e-13	2.40638e-11
6.trna112	129.638	4.15254	0.575781	7.21202	5.51295e-13	2.92187e-11
1.trna94	163.972	3.9025	0.543853	7.17566	7.19596e-13	3.01752e-11
6.trna51	86.192	5.30717	0.739849	7.17332	7.32012e-13	3.01752e-11
1.trna51	103.028	4.99438	0.712336	7.01127	2.36166e-12	8.76178e-11
6.trna159	75.2604	6.35017	0.918708	6.91206	4.7765e-12	1.61098e-10
16.trna29	78.4384	5.24802	0.766609	6.84576	7.607e-12	2.35183e-10
1.trna57	82.1177	5.33032	0.781232	6.82297	8.91782e-12	2.54501e-10
10.trna6	67.3919	6.72945	0.997579	6.74578	1.5221e-11	4.03357e-10
6.trna154	89.1844	4.57	0.685633	6.66537	2.64007e-11	6.52977e-10
1.trna46	559.573	-2.48909	0.379184	-6.56432	5.22707e-11	1.21203e-09
1.trna97	78.6898	4.67777	0.723665	6.464	1.01968e-10	2.2253e-09
16.trna7	84.0691	4.78267	0.74293	6.43758	1.21392e-10	2.36923e-09
6.trna43	63.2407	6.07335	0.944554	6.42986	1.27721e-10	2.36923e-09
6.trna141	61.0161	7.07369	1.09819	6.44123	1.18512e-10	2.36923e-09
16.trna9	57.6334	6.98446	1.10546	6.31814	2.64722e-10	4.64859e-09
19.trna2	847.46	-2.31347	0.366527	-6.31188	2.75658e-10	4.64859e-09
19.trna4	592.569	-2.32553	0.370844	-6.27091	3.58947e-10	5.77764e-09
6.trna147	56.1623	6.40244	1.022	6.26461	3.73756e-10	5.77764e-09
6.trna55	58.8958	5.95638	0.957318	6.22194	4.91032e-10	7.28692e-09
1.trna55	108.598	4.44084	0.721026	6.15906	7.31773e-10	1.04303e-08
8.trna10	798.353	-2.27039	0.368973	-6.15326	7.59079e-10	1.04303e-08
1.trna53	112.19	4.55587	0.74111	6.14736	7.87845e-10	1.04389e-08
1.trna49	121.773	4.45516	0.741236	6.01045	1.8501e-09	2.36686e-08
6.trna25	70.2552	4.35136	0.726815	5.98689	2.13894e-09	2.64516e-08
16.trna10	53.4224	7.82698	1.31637	5.94588	2.74983e-09	3.29092e-08
11.trna8	540.819	-2.27653	0.384621	-5.91889	3.24124e-09	3.75781e-08
6.trna57	67.4393	4.52833	0.767275	5.90184	3.59479e-09	4.04142e-08
1.trna82	508.833	-2.23832	0.380715	-5.87925	4.1214e-09	4.49717e-08
6.trna149	46.3841	5.76711	1.01069	5.70611	1.1559e-08	1.22525e-07
16.trna34	421.758	-2.37415	0.417046	-5.69279	1.24981e-08	1.288e-07
6.trna142	46.5026	5.37813	0.955457	5.62886	1.81409e-08	1.81899e-07
15.trna11	444.712	-2.35623	0.4299	-5.48089	4.23195e-08	4.13172e-07
6.trna5	121.5	3.04125	0.557645	5.45374	4.93225e-08	4.69196e-07
1.trna9	525.596	-2.36003	0.43514	-5.42362	5.84041e-08	5.41698e-07
16.trna11	49.5345	4.61819	0.85369	5.40968	6.31389e-08	5.7133e-07
1.trna66	585.258	-1.99681	0.375914	-5.31188	1.08499e-07	8.87923e-07
6.trna67	36.9224	5.75735	1.08281	5.31704	1.05468e-07	8.87923e-07
6.trna139	61.8087	4.14815	0.781169	5.31018	1.09515e-07	8.87923e-07
6.trna143	97.3041	3.48032	0.655523	5.30922	1.10093e-07	8.87923e-07
6.trna153	36.3894	7.25653	1.36553	5.31409	1.07192e-07	8.87923e-07
1.trna79	393.382	-2.12245	0.40181	-5.28222	1.27629e-07	1.00745e-06
6.trna150	48.248	4.83242	0.919944	5.25295	1.49683e-07	1.15692e-06
12.trna12	498.215	-2.10988	0.405247	-5.2064	1.92534e-07	1.45776e-06
16.trna30	34.0023	7.14584	1.37382	5.20146	1.97733e-07	1.46718e-06
6.trna144	45.5846	4.94585	0.960309	5.15027	2.60106e-07	1.89214e-06
15.trna9	540.695	-1.93624	0.376786	-5.13882	2.76462e-07	1.97245e-06
1.trna96	68.2151	3.98889	0.791506	5.03962	4.6645e-07	3.26515e-06
6.trna176	57.3458	4.26442	0.850381	5.01472	5.31098e-07	3.64884e-06
10.trna2	407.449	-2.00272	0.40557	-4.93803	7.89158e-07	5.22817e-06
6.trna118	30.3135	5.96562	1.20777	4.93935	7.83826e-07	5.22817e-06
16.trna6	39.7838	4.75735	0.9717	4.89591	9.78523e-07	6.36898e-06
16.trna3	308.919	-2.23844	0.459894	-4.86731	1.13128e-06	7.23631e-06
17.trna2	363.922	-2.13041	0.442054	-4.81933	1.44038e-06	9.05728e-06
6.trna146	168.909	2.42768	0.507308	4.78542	1.70633e-06	1.05508e-05
6.trna111	41.5836	4.20977	0.887581	4.74298	2.10601e-06	1.28087e-05
19.trna13	332.878	-2.15186	0.460864	-4.66919	3.02387e-06	1.80944e-05
6.trna42	49.6316	3.96436	0.849907	4.66447	3.09418e-06	1.82213e-05
12.trna4	485.281	-1.81796	0.392118	-4.63625	3.54786e-06	2.05665e-05
6.trna108	59.7413	3.95435	0.853534	4.63291	3.60553e-06	2.05793e-05
16.trna12	23.291	6.57544	1.42675	4.60868	4.05241e-06	2.27794e-05
6.trna44	364.535	-1.87913	0.408075	-4.60486	4.12748e-06	2.28552e-05
13.trna3	491.895	-1.9647	0.429836	-4.57082	4.8583e-06	2.65063e-05
5.trna8	502.61	-1.72688	0.379195	-4.55408	5.26163e-06	2.82908e-05
15.trna10	482.255	-1.71048	0.378056	-4.5244	6.05672e-06	3.21006e-05
3.trna2	259.233	-2.36441	0.526905	-4.48735	7.21147e-06	3.76825e-05
17.trna38	488.415	-1.71905	0.384054	-4.47608	7.60262e-06	3.91746e-05
6.trna9	296.45	-1.94605	0.43746	-4.44851	8.64676e-06	4.39445e-05
6.trna106	442.213	-1.83761	0.413742	-4.44145	8.93552e-06	4.47983e-05
1.trna26	471.919	-1.69936	0.383936	-4.42614	9.59321e-06	4.74544e-05
1.trna68	339.584	-2.08871	0.473093	-4.41502	1.01e-05	4.86587e-05
1.trna129	58.7375	-3.60035	0.815106	-4.41704	1.00064e-05	4.86587e-05
6.trna16	55.3069	3.59195	0.814085	4.41225	1.02301e-05	4.86587e-05
21.trna2	320.4	2.02004	0.464109	4.35252	1.34582e-05	6.24125e-05
6.trna136	460.631	-2.00456	0.460438	-4.35359	1.33928e-05	6.24125e-05
6.trna181	276.025	-2.39614	0.553632	-4.32803	1.50448e-05	6.89091e-05
11.trna11	419.722	-1.90064	0.439686	-4.32271	1.54124e-05	6.97318e-05
14.trna13	326.425	-1.88748	0.439442	-4.29517	1.74559e-05	7.80256e-05
1.trna148	107.797	2.65305	0.621683	4.26752	1.97658e-05	8.72988e-05
6.trna2	507.573	-1.59117	0.375047	-4.24259	2.20952e-05	9.64391e-05
3.trna11	506.86	-1.57311	0.373991	-4.20626	2.59627e-05	0.000112002
17.trna9	384.029	-1.85028	0.441716	-4.18883	2.80393e-05	0.000118698
6.trna123	109.51	2.68226	0.640478	4.1879	2.81547e-05	0.000118698
6.trna127	65.8982	3.1102	0.743559	4.18286	2.87864e-05	0.000119997
6.trna64	78.691	2.78082	0.668788	4.158	3.21039e-05	0.00013234
7.trna3	442.951	-1.96349	0.476881	-4.11737	3.83225e-05	0.000156238
17.trna10	478.946	-1.68464	0.409624	-4.11266	3.9113e-05	0.000157727
2.trna2	811.471	-1.41917	0.346963	-4.09026	4.30887e-05	0.000171891
7.trna15	29.3787	4.15565	1.01755	4.08395	4.4276e-05	0.000174749
17.trna12	533.651	-1.57825	0.388042	-4.0672	4.75812e-05	0.000185817
11.trna13	390.521	-1.7064	0.420739	-4.05573	4.99786e-05	0.000193147
6.trna66	55.6938	3.22519	0.798036	4.04141	5.31315e-05	0.000203214
1.trna98	79.1395	2.5912	0.641652	4.03833	5.38331e-05	0.000203797
1.trna4	55.3172	3.48171	0.863999	4.02976	5.58337e-05	0.000209235
6.trna71	39.0176	3.58833	0.90222	3.97722	6.97255e-05	0.000258682
6.trna129	47.0951	3.27364	0.823848	3.97359	7.07962e-05	0.000260053
12.trna8	401.257	-1.60173	0.404292	-3.96182	7.43801e-05	0.000270539
11.trna7	306.19	-1.78014	0.450453	-3.9519	7.75341e-05	0.000279273
6.trna103	294.773	-1.95322	0.496482	-3.93412	8.35019e-05	0.000297877
1.trna17	55.1993	3.13734	0.802476	3.90958	9.2456e-05	0.000326678
15.trna7	357.482	-1.65737	0.42495	-3.90015	9.61323e-05	0.000336463
2.trna19	416.919	-1.5588	0.400081	-3.8962	9.77149e-05	0.000338806
6.trna105	462.442	-1.73197	0.453786	-3.8167	0.000135246	0.000464595
17.trna5	350.105	-1.53248	0.404811	-3.78566	0.0001533	0.000521226
6.trna152	91.3733	2.41078	0.637155	3.78366	0.000154541	0.000521226
14.trna19	25.8492	3.93428	1.04568	3.76241	0.000168284	0.000562464
6.trna10	360.101	-1.74631	0.464609	-3.75866	0.000170826	0.000565863
1.trna151	58.9379	3.29302	0.885241	3.71991	0.000199292	0.000654312
16.trna1	559.124	-1.42233	0.38262	-3.71733	0.000201336	0.000655224
11.trna16	401.051	-1.50096	0.404644	-3.70934	0.000207797	0.000670372
17.trna26	555.276	-1.4598	0.394274	-3.70249	0.00021349	0.000682799
12.trna6	281.052	-1.61467	0.439288	-3.67566	0.000237234	0.000752255
6.trna26	15.5316	4.9723	1.36659	3.63846	0.000274277	0.000862344
6.trna40	26.4804	4.06745	1.11927	3.63401	0.000279045	0.000869963
7.trna13	15.2571	4.94136	1.36814	3.61173	0.000304163	0.00094037
8.trna5	144.24	-1.94799	0.540526	-3.60388	0.000313507	0.00096125

## Sheet: Huh7-vs-HepG2
gene ID	baseMean	log2FoldChange	lfcSE	stat	pvalue	padj
1.trna7	102.483	5.65565	0.530695	10.6571	1.61634e-26	5.99661e-24
11.trna12	354.961	2.02751	0.205487	9.86684	5.79639e-23	1.07523e-20
14.trna7	578.5	-1.70516	0.18195	-9.37156	7.14703e-21	8.83849e-19
11.trna13	432.131	1.75737	0.19001	9.24884	2.2694e-20	2.10487e-18
1.trna115	67.3123	4.91274	0.541058	9.07988	1.08694e-19	8.06512e-18
11.trna4	268.441	2.03625	0.224829	9.0569	1.34213e-19	8.29886e-18
6.trna150	51.131	-4.4516	0.531106	-8.38176	5.21422e-17	2.76354e-15
11.trna14	242.849	1.94704	0.235115	8.28121	1.21931e-16	5.65453e-15
1.trna141	177.257	2.1463	0.274242	7.82629	5.0247e-15	2.07129e-13
11.trna16	399.632	1.33449	0.188112	7.09414	1.30156e-12	4.82879e-11
1.trna5	95.5418	2.69109	0.381798	7.04846	1.80913e-12	6.10169e-11
1.trna57	103.224	-2.28832	0.333769	-6.85599	7.0818e-12	2.18946e-10
6.trna80	46.1841	3.42508	0.517147	6.62303	3.51909e-11	1.0043e-09
1.trna2	143.867	1.86181	0.287839	6.46825	9.91456e-11	2.62736e-09
11.trna2	154.045	1.82985	0.286112	6.39555	1.59975e-10	3.95672e-09
1.trna136	341.799	1.27266	0.202042	6.299	2.9958e-10	6.9465e-09
6.trna8	226.419	-1.51641	0.242922	-6.24239	4.30943e-10	9.40469e-09
21.trna2	401.352	-1.16495	0.18695	-6.23133	4.62496e-10	9.53255e-09
16.trna15	335.332	-1.22155	0.19977	-6.11475	9.67107e-10	1.8884e-08
1.trna46	307.575	1.25895	0.207183	6.0765	1.22834e-09	2.27858e-08
16.trna16	499.39	-1.07282	0.178205	-6.02016	1.7424e-09	3.07823e-08
10.trna6	88.6392	-2.00169	0.341438	-5.86253	4.55867e-09	7.68758e-08
19.trna4	340.95	1.15602	0.197713	5.84698	5.00591e-09	8.07475e-08
2.trna3	324.877	-1.26106	0.220764	-5.71227	1.11478e-08	1.65434e-07
2.trna20	198.837	-1.50441	0.263066	-5.71874	1.07316e-08	1.65434e-07
1.trna49	166.493	-1.61809	0.284142	-5.69465	1.23623e-08	1.69867e-07
6.trna62	135.868	-1.71017	0.300144	-5.69783	1.2134e-08	1.69867e-07
16.trna24	45.4859	-2.54919	0.452295	-5.63611	1.73931e-08	2.30459e-07
1.trna23	95.4557	1.86144	0.342094	5.44131	5.28889e-08	6.76614e-07
10.trna4	317.721	1.08747	0.2118	5.1344	2.83047e-07	3.50034e-06
1.trna53	159.794	-1.39641	0.277766	-5.02728	4.97486e-07	5.95378e-06
6.trna23	15.9659	-3.19132	0.636266	-5.0157	5.2842e-07	6.12637e-06
2.trna5	232.8	-1.15528	0.234861	-4.919	8.6989e-07	9.77967e-06
1.trna55	153.809	-1.41139	0.297356	-4.74647	2.06998e-06	2.25872e-05
16.trna27	377.037	-0.899382	0.190431	-4.72288	2.32533e-06	2.46485e-05
6.trna168	17.8733	-2.90853	0.620475	-4.68758	2.76455e-06	2.84902e-05
6.trna178	21.4191	-2.67925	0.582274	-4.60136	4.19738e-06	4.20872e-05
6.trna152	114.353	-1.35404	0.299162	-4.52612	6.00763e-06	5.86534e-05
17.trna14	205.673	-1.0552	0.233809	-4.51307	6.38963e-06	6.07834e-05
11.trna7	227.121	1.05821	0.238344	4.43982	9.00322e-06	8.02955e-05
14.trna2	159.197	1.18982	0.26842	4.43269	9.30649e-06	8.02955e-05
6.trna26	76.0897	1.65133	0.371868	4.44062	8.96988e-06	8.02955e-05
6.trna155	28.2741	-2.34922	0.5294	-4.43751	9.10067e-06	8.02955e-05
2.trna2	364.538	-0.859318	0.194857	-4.40999	1.03376e-05	8.71651e-05
6.trna7	304	-0.873185	0.200454	-4.35603	1.32445e-05	0.000109194
6.trna36	35.7083	2.2126	0.511455	4.32608	1.51783e-05	0.000122417
11.trna15	276.09	0.906115	0.215388	4.20689	2.58911e-05	0.000204374
6.trna138	15.0457	-2.63415	0.62807	-4.19403	2.74038e-05	0.000211809
1.trna113	23.1891	2.53228	0.605453	4.18245	2.8838e-05	0.000218345
1.trna73	303.994	0.849369	0.204437	4.15468	3.25743e-05	0.000236962
1.trna150	336.184	-0.820737	0.197515	-4.15532	3.24834e-05	0.000236962
1.trna51	153.549	-1.21895	0.298097	-4.0891	4.33047e-05	0.000308962
1.trna95	540.529	-0.721528	0.178141	-4.05032	5.11483e-05	0.000358038
16.trna12	29.3628	-2.07064	0.514628	-4.02356	5.73245e-05	0.000388108
6.trna179	211.926	-0.926435	0.230302	-4.02269	5.75363e-05	0.000388108
6.trna160	32.3231	2.07042	0.51857	3.99255	6.53676e-05	0.00043306
6.trna183	160.509	-1.07826	0.271096	-3.9774	6.96722e-05	0.00045348
6.trna55	85.3707	-1.35323	0.342538	-3.9506	7.79548e-05	0.000498642
6.trna3	10.7034	-2.56465	0.659938	-3.8862	0.000101826	0.000640293
6.trna166	13.6716	-2.45778	0.642204	-3.8271	0.000129663	0.000801747
3.trna11	361.18	0.722389	0.189429	3.81351	0.000137006	0.000833264
15.trna7	256.731	0.841272	0.221291	3.80165	0.000143734	0.000860085
